# Supplementary material for: Dynamical Approach to Multi-Equilibria Problems Considering the Debye–Hückel Theory of Electrolyte Solutions: Concentration Quotients as a Function of Ionic Strength
Source: Springer Nature journal article supplement (doi:10.1007/s10953-017-0593-z), 2017-03-01
Supplement: MOESM1 [file 10953_2017_593_MOESM1_ESM.pdf]

Supplementary Material for:

**Dynamical Approach to Multi-Equilibria Problems Considering Debye–Hückel Theory of Electrolyte Solutions. Concentration Quotients as a Function of Ionic Strength**

**Ethan Zars<sup>1</sup> · Joseph Schell<sup>1</sup> · Marco A. Delarosa<sup>1,2</sup> · Carmen Chicone<sup>2</sup> · Rainer Glaser<sup>1</sup>**

---

✉ Rainer Glaser  
[glaserr@missouri.edu](mailto:glaserr@missouri.edu)

Carmen Chicone  
[chiconec@missouri.edu](mailto:chiconec@missouri.edu)

<sup>1</sup> Department of Chemistry, University of Missouri, Columbia, Missouri 65211, USA

<sup>2</sup> Department of Mathematics, University of Missouri, Columbia, Missouri 65211, USA

**Table of Content**

|                                                                                                                                                                                                                                                                                     |     |
|-------------------------------------------------------------------------------------------------------------------------------------------------------------------------------------------------------------------------------------------------------------------------------------|-----|
| <b>Table S1</b> Extended version of Table 1 .....                                                                                                                                                                                                                                   | S2  |
| <b>Fig. S1</b> Computed $\text{pH}_{\text{con}}$ values of acetate-buffered acetic acid .....                                                                                                                                                                                       | S5  |
| There is no Fig. S2                                                                                                                                                                                                                                                                 |     |
| <b>Fig. S3</b> Computed $\text{pH}_{\text{con}}$ values from hydroxide titration of $0.2 \text{ mol}\cdot\text{L}^{-1}$ citric acid .....                                                                                                                                           | S6  |
| There is no Fig. S4                                                                                                                                                                                                                                                                 |     |
| <b>Fig. S5</b> Species concentrations from hydroxide titration of $0.2 \text{ mol}\cdot\text{L}^{-1}$ citric acid .....                                                                                                                                                             | S7  |
| There is no Fig. S6                                                                                                                                                                                                                                                                 |     |
| <b>Fig. S7</b> Hydroxide titration of a $0.2 \text{ mol}\cdot\text{L}^{-1}$ triprotic model acid with $\text{p}K_{\text{a}}$ values of 3, 6, and 9: pH as a function of added hydroxide .....                                                                                       | S8  |
| <b>Fig. S8</b> Hydroxide-titration of a $0.2 \text{ mol}\cdot\text{L}^{-1}$ triprotic model acid. Concentration quotient ( $-\log_{10}(Q)$ ) as a function of ionic strength ( $I$ ) .....                                                                                          | S9  |
| <b>Fig. S9</b> Hydroxide-titration of a $0.2 \text{ mol}\cdot\text{L}^{-1}$ triprotic model acid with $\text{p}K_{\text{a}}$ values of 3, 6, and 9. Concentration of $\text{H}_3\text{A}$ , $\text{H}_2\text{A}^-$ , $\text{HA}^{2-}$ and $\text{A}^{3-}$ as a function of pH ..... | S10 |

**Table S1** Comparison of experimental and computed pH values

|                         |                        | Ref. [35] <sup>a</sup> | Our calculations                  |                                                          |                                               |                                               |                                                          |                                               | Ref. [36] method                              |                                               |                                               |
|-------------------------|------------------------|------------------------|-----------------------------------|----------------------------------------------------------|-----------------------------------------------|-----------------------------------------------|----------------------------------------------------------|-----------------------------------------------|-----------------------------------------------|-----------------------------------------------|-----------------------------------------------|
| Multi-Equilibria System |                        | pH <sub>exp</sub>      | pH <sub>con</sub><br><i>I</i> = 0 | pH <sub>con</sub><br><i>b</i> = 0<br>G'berg <sup>b</sup> | pH <sub>con</sub><br><i>b</i> = 0.2<br>Davies | pH <sub>con</sub><br><i>b</i> = 0.1<br>Davies | pH <sub>act</sub><br><i>b</i> = 0<br>G'berg <sup>b</sup> | pH <sub>act</sub><br><i>b</i> = 0.2<br>Davies | pH <sub>act</sub><br><i>b</i> = 0.1<br>Davies | pH <sub>con</sub><br><i>b</i> = 0.1<br>Davies | pH <sub>act</sub><br><i>b</i> = 0.1<br>Davies |
| Acetate buffer          |                        |                        |                                   |                                                          |                                               |                                               |                                                          |                                               |                                               |                                               |                                               |
| HAc                     | NaAc                   |                        |                                   |                                                          |                                               |                                               |                                                          |                                               |                                               |                                               |                                               |
| (mol·L <sup>-1</sup> )  | (mol·L <sup>-1</sup> ) |                        |                                   |                                                          |                                               |                                               |                                                          |                                               |                                               |                                               |                                               |
| 0.0926                  | 0.0074                 | 3.6                    | 3.68                              | 3.60                                                     | 3.60                                          | 3.60                                          | 3.63                                                     | 3.63                                          | 3.63                                          | 3.60                                          | 3.64                                          |
| 0.088                   | 0.012                  | 3.8                    | 3.90                              | 3.80                                                     | 3.80                                          | 3.80                                          | 3.84                                                     | 3.84                                          | 3.84                                          | 3.80                                          | 3.85                                          |
| 0.082                   | 0.018                  | 4.0                    | 4.10                              | 3.98                                                     | 3.99                                          | 3.99                                          | 4.03                                                     | 4.03                                          | 4.03                                          | 3.99                                          | 4.04                                          |
| 0.0736                  | 0.0264                 | 4.2                    | 4.32                              | 4.17                                                     | 4.18                                          | 4.18                                          | 4.23                                                     | 4.23                                          | 4.23                                          | 4.18                                          | 4.25                                          |
| 0.061                   | 0.039                  | 4.4                    | 4.57                              | 4.40                                                     | 4.41                                          | 4.40                                          | 4.46                                                     | 4.47                                          | 4.46                                          | 4.40                                          | 4.48                                          |
| 0.051                   | 0.049                  | 4.6                    | 4.74 <sup>e</sup>                 | 4.56                                                     | 4.57                                          | 4.56                                          | 4.63                                                     | 4.64                                          | 4.63                                          | 4.56                                          | 4.65 <sup>d</sup>                             |
| 0.04                    | 0.06                   | 4.8                    | 4.94                              | 4.74                                                     | 4.75                                          | 4.74                                          | 4.81                                                     | 4.82                                          | 4.82                                          | 4.74                                          | 4.84                                          |
| 0.0296                  | 0.0704                 | 5.0                    | 5.14                              | 4.92                                                     | 4.94                                          | 4.93                                          | 5.00                                                     | 5.02                                          | 5.01                                          | 4.93                                          | 5.03                                          |
| 0.021                   | 0.079                  | 5.2                    | 5.34                              | 5.11                                                     | 5.13                                          | 5.12                                          | 5.19                                                     | 5.21                                          | 5.20                                          | 5.12                                          | 5.23                                          |
| 0.0176                  | 0.0824                 | 5.4                    | 5.43                              | 5.20                                                     | 5.22                                          | 5.21                                          | 5.29                                                     | 5.30                                          | 5.30                                          | 5.21                                          | 5.32                                          |
| 0.0096                  | 0.0904                 | 5.6                    | 5.73                              | 5.50                                                     | 5.52                                          | 5.51                                          | 5.59                                                     | 5.60                                          | 5.59                                          | 5.51                                          | 5.62                                          |
| Citric acid titration   |                        |                        |                                   |                                                          |                                               |                                               |                                                          |                                               |                                               |                                               |                                               |
| Citric acid             | NaOH                   |                        |                                   |                                                          |                                               |                                               |                                                          |                                               |                                               |                                               |                                               |
| (mol·L <sup>-1</sup> )  | (mol·L <sup>-1</sup> ) |                        |                                   |                                                          |                                               |                                               |                                                          |                                               |                                               |                                               |                                               |
| 0.2                     | 0.02                   | 2.15                   | 2.29                              | 2.19                                                     | 2.19                                          | 2.19                                          | 2.25                                                     | 2.25                                          | 2.26                                          | 2.17                                          | 2.24                                          |
| 0.2                     | 0.04                   | 2.39                   | 2.56                              | 2.43                                                     | 2.44                                          | 2.43                                          | 2.50                                                     | 2.50                                          | 2.52                                          | 2.40                                          | 2.48                                          |
| 0.2                     | 0.06                   | 2.58                   | 2.77                              | 2.61                                                     | 2.62                                          | 2.62                                          | 2.69                                                     | 2.70                                          | 2.72                                          | 2.57                                          | 2.67                                          |
| 0.2                     | 0.08                   | 2.75                   | 2.95                              | 2.77                                                     | 2.78                                          | 2.77                                          | 2.86                                                     | 2.86                                          | 2.88                                          | 2.72                                          | 2.83                                          |
| 0.2                     | 0.10                   | 2.89                   | 3.11                              | 2.91                                                     | 2.92                                          | 2.91                                          | 3.00                                                     | 3.01                                          | 3.03                                          | 2.86                                          | 2.98                                          |
| 0.2                     | 0.12                   | 3.04                   | 3.26                              | 3.04                                                     | 3.05                                          | 3.04                                          | 3.14                                                     | 3.15                                          | 3.17                                          | 2.98                                          | 3.11                                          |

|     |                   |      |                   |      |      |      |      |      |      |      |                   |
|-----|-------------------|------|-------------------|------|------|------|------|------|------|------|-------------------|
| 0.2 | 0.14              | 3.18 | 3.42 <sup>e</sup> | 3.16 | 3.18 | 3.17 | 3.27 | 3.29 | 3.31 | 3.11 | 3.24 <sup>c</sup> |
| 0.2 | 0.16              | 3.32 | 3.59              | 3.29 | 3.31 | 3.30 | 3.41 | 3.42 | 3.44 | 3.23 | 3.38              |
| 0.2 | 0.18              | 3.46 | 3.76              | 3.41 | 3.45 | 3.43 | 3.54 | 3.56 | 3.58 | 3.36 | 3.51              |
| 0.2 | 0.20              | 3.59 | 3.94              | 3.54 | 3.58 | 3.56 | 3.67 | 3.70 | 3.71 | 3.48 | 3.64              |
| 0.2 | 0.22              | 3.75 | 4.13              | 3.66 | 3.71 | 3.68 | 3.80 | 3.83 | 3.84 | 3.60 | 3.76              |
| 0.2 | 0.24              | 3.90 | 4.30              | 3.77 | 3.83 | 3.80 | 3.92 | 3.96 | 3.96 | 3.72 | 3.88              |
| 0.2 | 0.26              | 4.03 | 4.46              | 3.87 | 3.95 | 3.91 | 4.03 | 4.09 | 4.08 | 3.83 | 4.00              |
| 0.2 | 0.28              | 4.14 | 4.61              | 3.97 | 4.06 | 4.02 | 4.14 | 4.21 | 4.19 | 3.94 | 4.12              |
| 0.2 | 0.30              | 4.27 | 4.76              | 4.07 | 4.18 | 4.13 | 4.24 | 4.32 | 4.30 | 4.05 | 4.23              |
| 0.2 | 0.32              | 4.37 | 4.91              | 4.17 | 4.29 | 4.23 | 4.35 | 4.44 | 4.41 | 4.16 | 4.34              |
| 0.2 | 0.34              | 4.50 | 5.06 <sup>e</sup> | 4.27 | 4.41 | 4.34 | 4.45 | 4.56 | 4.53 | 4.27 | 4.45 <sup>c</sup> |
| 0.2 | 0.36              | 4.62 | 5.22              | 4.37 | 4.54 | 4.45 | 4.56 | 4.69 | 4.64 | 4.38 | 4.57              |
| 0.2 | 0.38              | 4.74 | 5.40              | 4.47 | 4.66 | 4.57 | 4.67 | 4.82 | 4.76 | 4.50 | 4.69              |
| 0.2 | 0.40              | 4.87 | 5.58              | 4.57 | 4.79 | 4.68 | 4.78 | 4.95 | 4.88 | 4.62 | 4.81              |
| 0.2 | 0.42 <sup>c</sup> | 4.98 | 5.77              | 4.68 | 4.93 | 4.80 | 4.88 | 5.09 | 5.00 | 4.74 | 4.94              |
| 0.2 | 0.44              | 5.11 | 5.94              | 4.78 | 5.06 | 4.92 | 4.99 | 5.22 | 5.12 | 4.86 | 5.06              |
| 0.2 | 0.46              | 5.21 | 6.11              | 4.88 | 5.20 | 5.04 | 5.10 | 5.36 | 5.24 | 4.99 | 5.19              |
| 0.2 | 0.48 <sup>c</sup> | 5.34 | 6.27              | 4.99 | 5.34 | 5.16 | 5.21 | 5.50 | 5.36 | 5.11 | 5.32              |
| 0.2 | 0.50              | 5.49 | 6.43              | 5.10 | 5.48 | 5.29 | 5.33 | 5.65 | 5.49 | 5.25 | 5.45              |
| 0.2 | 0.52              | 5.63 | 6.59              | 5.23 | 5.64 | 5.43 | 5.46 | 5.80 | 5.64 | 5.40 | 5.60              |
| 0.2 | 0.54 <sup>c</sup> | 5.80 | 6.78              | 5.38 | 5.83 | 5.60 | 5.61 | 5.99 | 5.81 | 5.57 | 5.77              |
| 0.2 | 0.56 <sup>c</sup> | 6.02 | 7.01 <sup>e</sup> | 5.57 | 6.06 | 5.82 | 5.81 | 6.22 | 6.02 | 5.79 | 5.99 <sup>c</sup> |
| 0.2 | 0.58 <sup>c</sup> | 6.33 | 7.36              | 5.89 | 6.41 | 6.15 | 6.14 | 6.57 | 6.36 | 6.13 | 6.34              |
| 0.2 | 0.59 <sup>c</sup> | 6.51 | 7.68              | 6.20 | 6.74 | 6.47 | 6.45 | 6.89 | 6.67 | 6.45 | 6.66              |

Units of  $b$ ,  $\text{L}\cdot\text{mol}^{-1}$

<sup>a</sup>Experimental data for citric acid titration reported to two digits, see Table 10.9 in ref. [3]. Experimental data for acetic acid buffer reported to one digit, see Table 10.18 in ref. [35]

<sup>b</sup>G'berg = Güntelberg

<sup>c</sup>Ionic strength values are given in Fig. 4. The  $I$  values allow the determination of the highest pH values for which the above data and the graphs in Fig. 3 are within the recommended limits of the respective approximations

<sup>d</sup>Values computed with the Baeza–Baeza method, that are also presented in the ref. [36]

<sup>e</sup>The calculated value shown exactly matches the corresponding value presented in ref. [36]

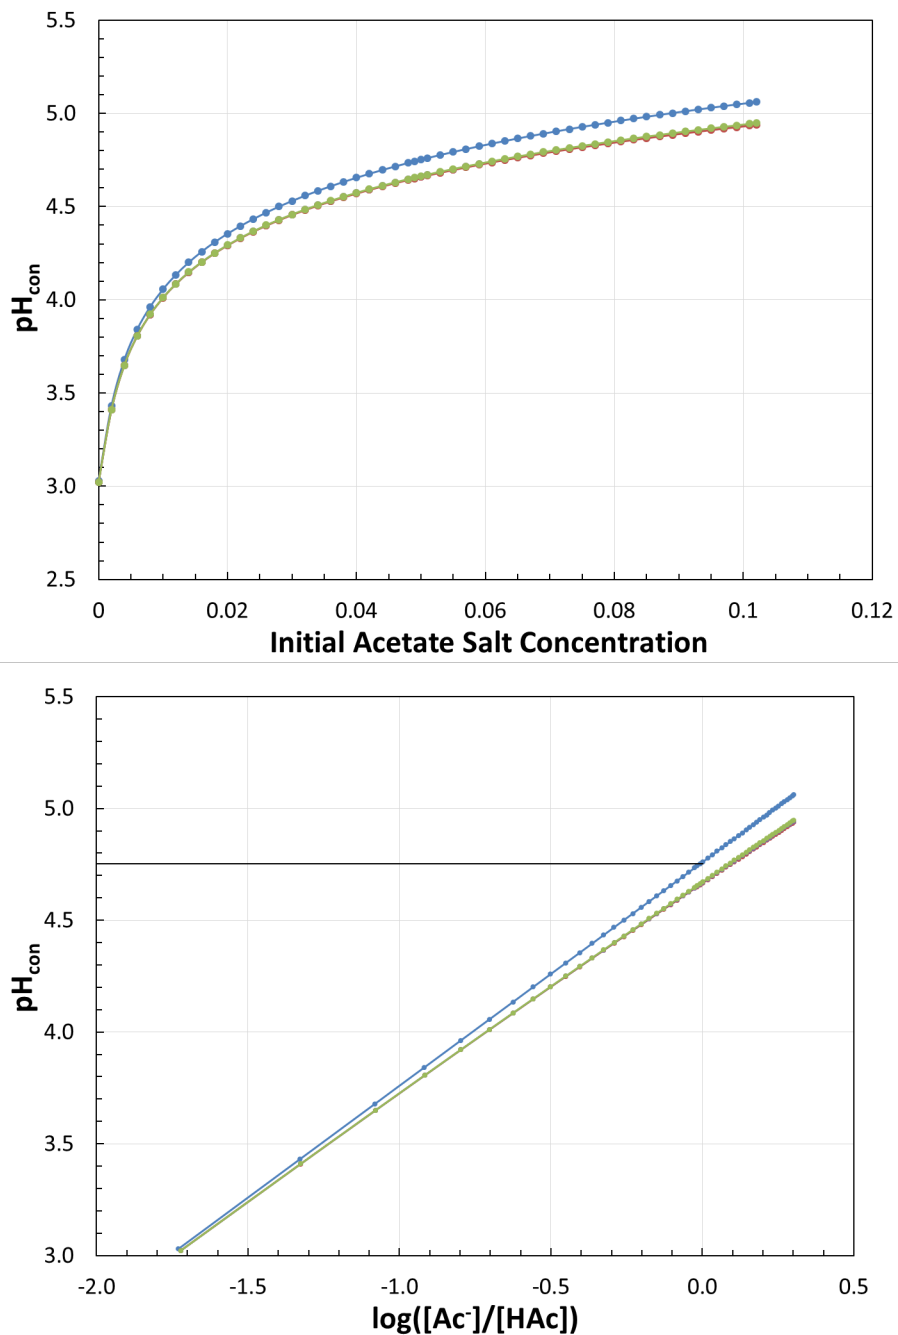

**Fig. S1** Computed  $\text{pH}_{\text{con}}$  values of acetate-buffered acetic acid. Top plot:  $\text{pH}_{\text{con}}$  as a function of the amount of added acetate. Bottom plot:  $\text{pH}_{\text{con}}$  as a function of  $\log_{10}([\text{Ac}^-]/[\text{HAc}]) = -\log_{10}([\text{HAc}]/[\text{Ac}^-])$ . Line color represents different approximations to Debye–Hückel (DH) theory:  $I = 0$  (blue,  $\text{pH}_{\text{con}} = 4.76 + \log_{10}([\text{Ac}^-]/[\text{HAc}])$ ), Güntelberg (red,  $\text{pH}_{\text{con}} = 4.6638 + 0.9371 \cdot \log_{10}([\text{Ac}^-]/[\text{HAc}])$ ), and Davies with  $b = 0.1 \text{ L} \cdot \text{mol}^{-1}$  (purple,  $\text{pH}_{\text{con}} = 4.6668 + 0.9403 \cdot \log_{10}([\text{Ac}^-]/[\text{HAc}])$ ) or  $b = 0.2$  (green,  $\text{pH}_{\text{con}} = 4.6698 + 0.9434 \cdot \log_{10}([\text{Ac}^-]/[\text{HAc}])$ )

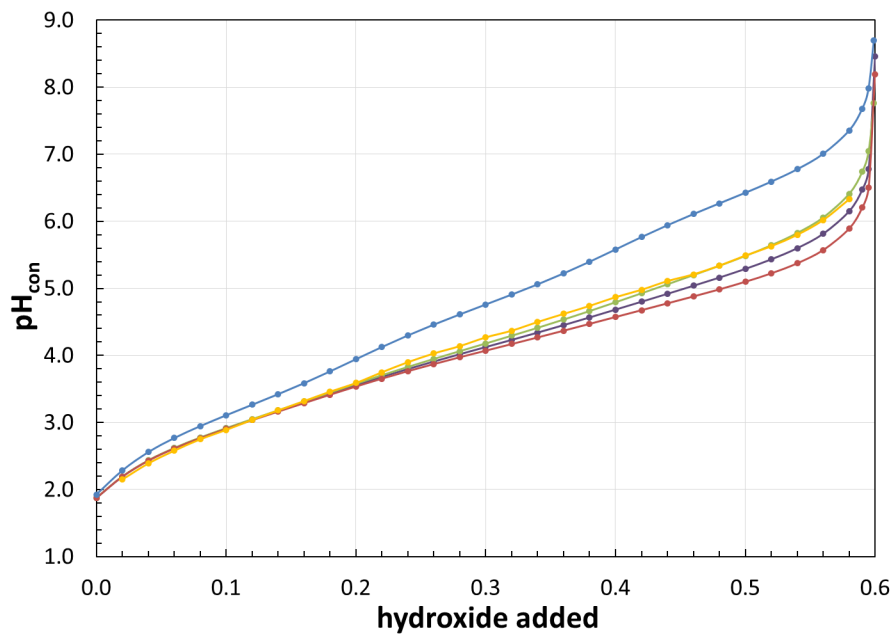

**Fig. S3** Computed  $\text{pH}_{\text{con}}$  values of hydroxide titration of  $0.2 \text{ mol}\cdot\text{L}^{-1}$  citric acid as a function of the amount of added hydroxide of the same concentration. Experimental data are shown in orange, and otherwise line color represents various approximations to the Debye–Hückel (DH) theory:  $I = 0$  (red), Güntelberg (green), Davies with  $b = 0.1 \text{ L}\cdot\text{mol}^{-1}$  (purple) or  $b = 0.2 \text{ L}\cdot\text{mol}^{-1}$  (blue)

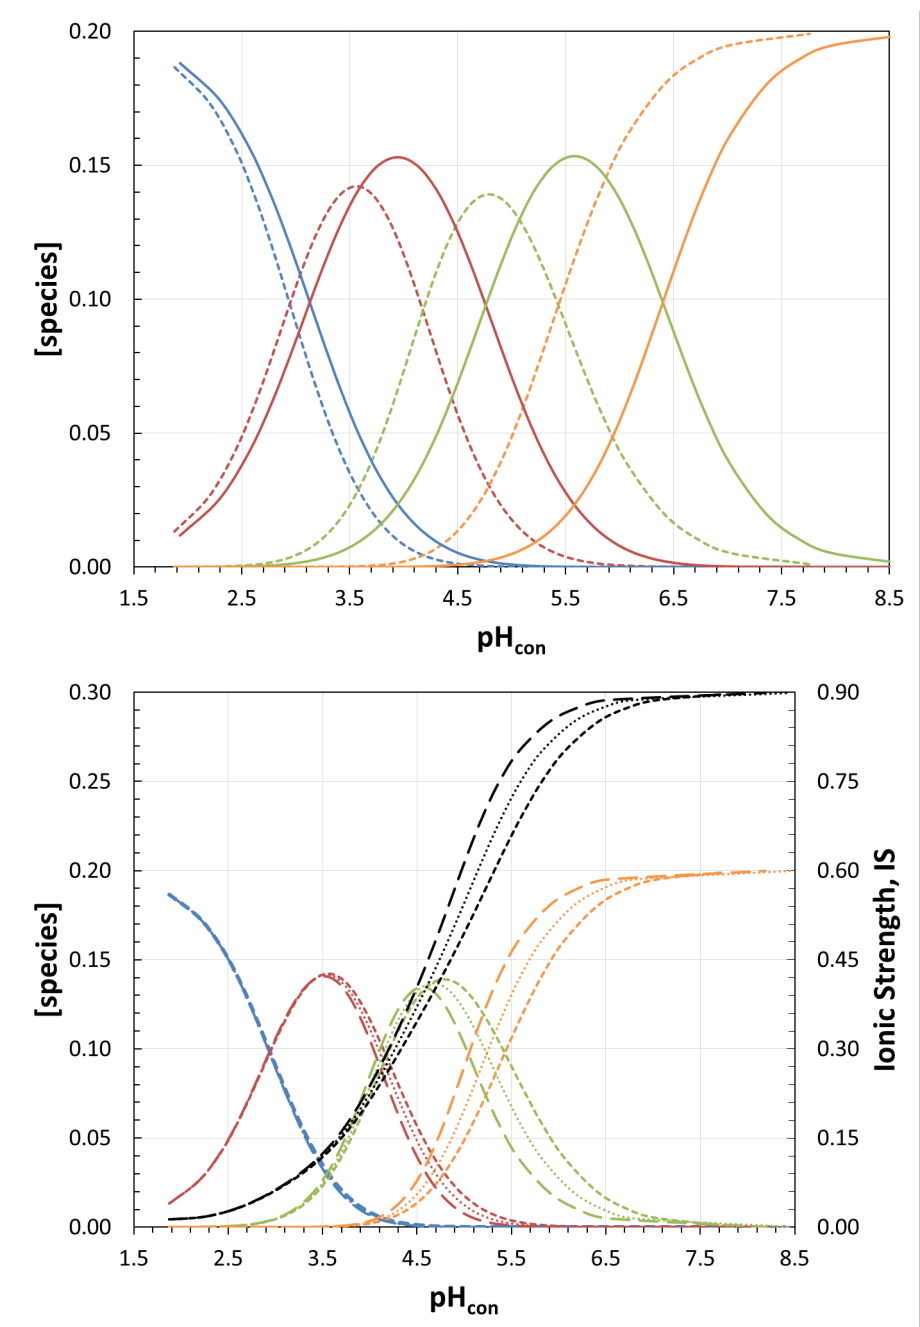

**Fig. S5** Species concentrations in hydroxide titration of  $0.2 \text{ mol}\cdot\text{L}^{-1}$  citric acid. Concentration of  $\text{H}_3\text{A}$  (blue),  $\text{H}_2\text{A}^-$  (red),  $\text{HA}^{2-}$  (green) and  $\text{A}^{3-}$  (orange) as a function of  $\text{pH}_{\text{con}}$ . Line style represents approximations to the Debye–Hückel theory:  $I = 0$  (solid), Güntelberg (long dash), Davies with  $b = 0.1 \text{ L}\cdot\text{mol}^{-1}$  (dotted) or  $b = 0.2 \text{ L}\cdot\text{mol}^{-1}$  (short dash). Top plot: ionic strength effect on concentrations. Bottom plot: effect of different DH approximations as function of concentration. Black curves show ionic strength calculated from the three DH methods

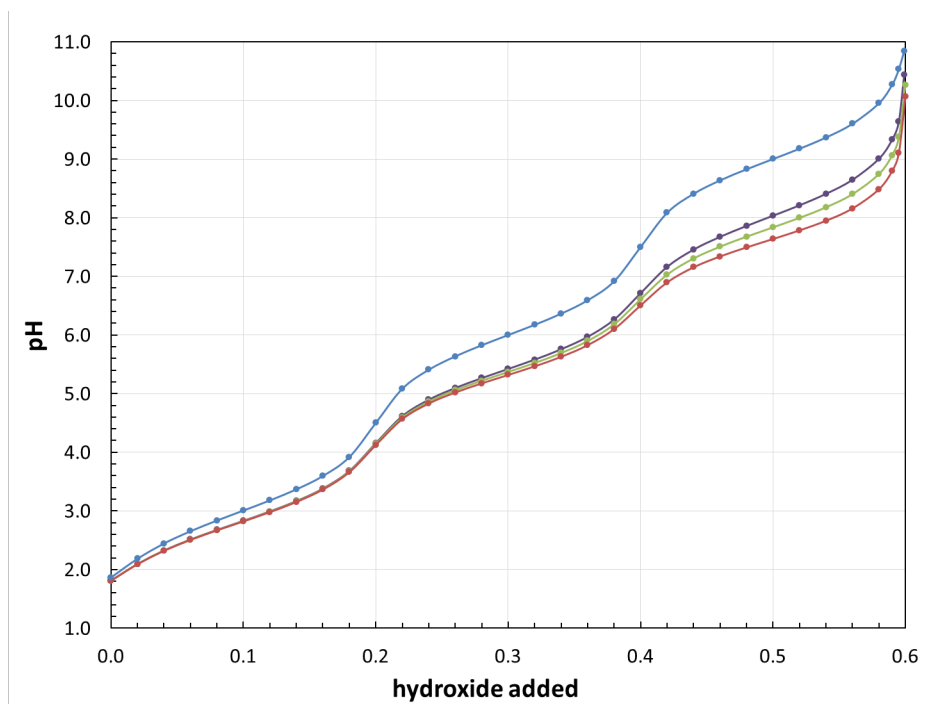

**Fig. S7** Hydroxide titration of a  $0.2 \text{ mol}\cdot\text{L}^{-1}$  triprotic model acid with  $\text{p}K_{\text{a}}$  values of 3, 6, and 9. pH as a function of added amount of hydroxide ion of the same concentration. Line color represents various approximations to the Debye–Hückel (DH) theory:  $I = 0$  (blue), Güntelberg (red), and Davies with  $b = 0.1 \text{ L}\cdot\text{mol}^{-1}$  (purple) or  $b = 0.2 \text{ L}\cdot\text{mol}^{-1}$  (green)



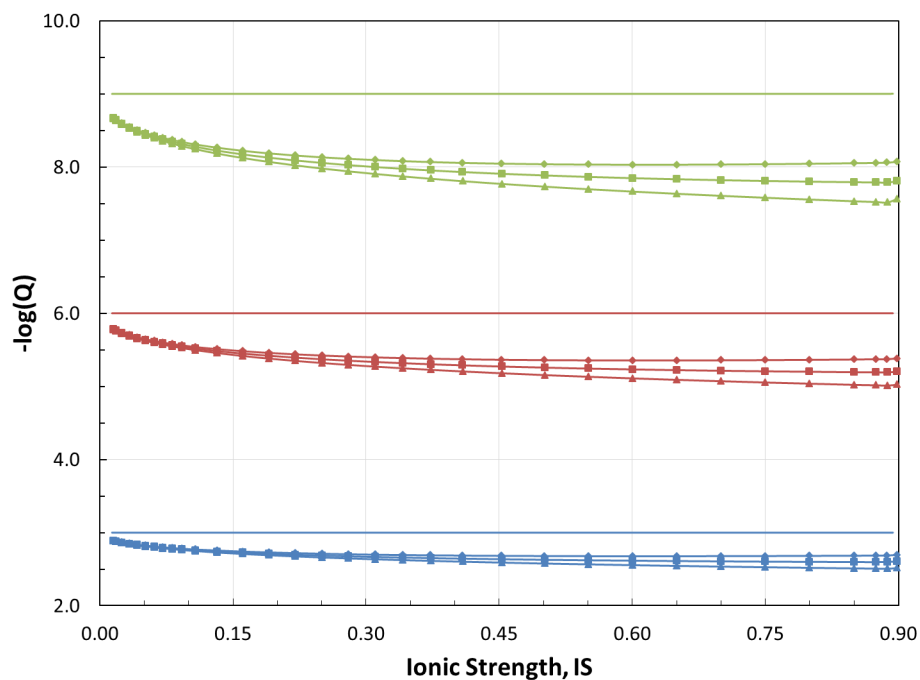

**Fig. S8** Hydroxide-titration of a  $0.2 \text{ mol}\cdot\text{L}^{-1}$  triprotic model acid. Negative logarithm of concentration quotient  $\{-\log_{10}(Q)\}$  as a function of ionic strength ( $I$ ) with  $Q = K_a^I = \frac{[\text{H}^+][\text{B}^-]}{[\text{HB}]}$ . Line colors identify the acid dissociation number: first (blue), second (red), and third (green) dissociation. Marker shape represents the DH approximation method:  $I = 0$  (no marker), Güntelberg (triangle), and Davies with  $b = 0.1 \text{ L}\cdot\text{mol}^{-1}$  (circle) or  $b = 0.2 \text{ L}\cdot\text{mol}^{-1}$  (square)

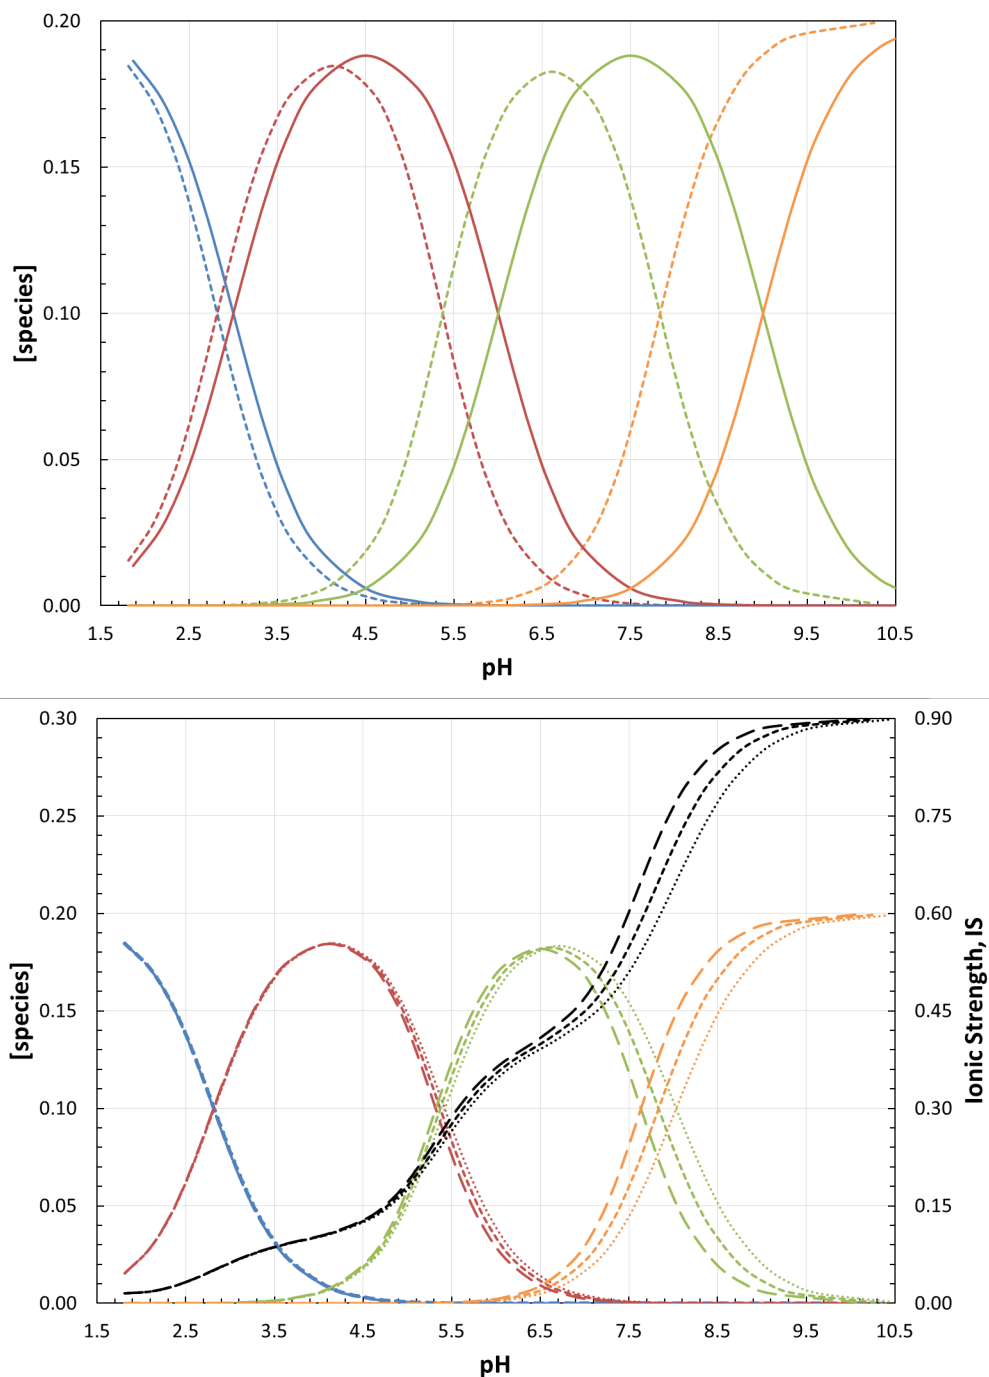

**Fig. S9** Hydroxide titration of  $0.2 \text{ mol}\cdot\text{L}^{-1}$  triprotic model acid with  $\text{p}K_{\text{a}}$  values of 3, 6, and 9. Concentration of  $\text{H}_3\text{A}$  (blue),  $\text{H}_2\text{A}^-$  (red),  $\text{HA}^{2-}$  (green) and  $\text{A}^{3-}$  (orange) as a function of the pH of the solution. Line style represents various approximations to the Debye–Hückel (DH) theory:  $I = 0$  (solid), Güntelberg (long dash), Davies with  $b = 0.1 \text{ L}\cdot\text{mol}^{-1}$  (dotted) or  $b = 0.2 \text{ L}\cdot\text{mol}^{-1}$  (short dash). Top plot: ionic strength effect on concentrations. Bottom plot: effect of different

DH approximations on concentrations. Black curves show the ionic strength calculated from the three different DH methods
